# Supplementary material for: Fuzzy Tandem Repeats Containing p53 Response Elements May Define Species-Specific p53 Target Genes
Source: PLoS Genet. 2012 Jun 28;8(6):e1002731. doi: 10.1371/journal.pgen.1002731 (PMC3386156; doi:10.1371/journal.pgen.1002731)
Supplement: Table S5 — Primers used in quantitative RT-PCR experiments. (DOC) [file pgen.1002731.s014.doc]

| **Species** | **Name** | **Sequence** |
| --- | --- | --- |
| **mouse** | p21-F | GCAGACCAGCCTGACAGATTC |
| p21-R | TTCAGGGTTTTCTCTTGCAGAAG |
| p130-F | GCAGCTACCGCAGCATGAG |
| p130-R | AAGGCACATGCTAACCAATGAA |
| Ncoa1-F | GCAGCCAAGGAGTGATAGAGAAG |
| Ncoa1-R | ACAGTTCACAACAAAGAAAAATCCAT |
| Klhl26-F | tcgatgtggtcctcactgtc |
| Klhl26-R | cctcagcactgtaggcaaaa |
| Rplp0-F | CGACCTGGAAGTCCAACTAC |
| Rplp0-R | ATCTGCTGCATCTGCTTG |
| Ppia-F | TCTCCTTCGAGCTGTTTGCA |
| Ppia-R | CAGTGCTCAGAGCTCGAAAGTTT |
| **rat** | p21-F | AGGCAGACCAGCCTAACAGA |
| p21-R | TTCAGGGCTTTCTCTTGCAG |
| p130-F | CTACACGCTGGAGGGAAATG |
| p130-R | CTTCAGCAGTCCCTTTGCTC |
| Ncoa1-F | AACCCCGGCAGACTCTAAAT |
| Ncoa1-R | TTGCTGCAAACTGGTTCAAG |
| Klhl26-F | TCGATGTGGTCCTCACTGTC |
| Klhl26-R | CCAGTGAACATGGCCCTAAA |
| Rplp0-F | GAGGTGCTGGACATCACAGA |
| Rplp0-R | TGATGGAGTGAGGCACTGAG |
| Ppia-F | AGCATACAGGTCCTGGCATC |
| Ppia-R | TTCACCTTCCCAAAGACCAC |
| **human** | p21-F | tggagactctcagggtcgaaaa |
| p21-R | cggcgtttggagtggtagaa |
| p130-F | ccgcagcatgagcgaaa |
| p130-R | ggcacatgctaaccaatgaaga |
| Ncoa1-F | ATACACCAAAATCGGCAAGC |
| Ncoa1-R | TGTGCCAACATTTGAGCATT |
| Klhl26-F | GCCTGCAGCGACTACTTCA |
| Klhl26-R | TAGGCGAAGTCGATGATGTG |
| Rplp0-F | cttgtctgtggagacggattacac |
| Rplp0-R | tacgccaagaaggccttga |
| Ppia-F | catctgcactgccaagactga |
| Ppia-R | ttcatgccttctttcactttgc |

**Table S5. Primers used in quantitative RT-PCR experiments.**
